# Supplementary material for: Highly adaptable deep-learning platform for automated detection and analysis of vesicle exocytosis
Source: Nat Commun. 2025 Jul 12;16:6450. doi: 10.1038/s41467-025-61579-3 (PMC12255801; doi:10.1038/s41467-025-61579-3)
Supplement: Supplementary file 10 — Source data [file 41467_2025_61579_MOESM10_ESM.xlsx]

## Sheet: Figure 2
Confidence	0	0	0.5	0.5	0.9	0.9		0	0	0.5	0.5	0.9	0.9		0	0	0.5	0.5	0.9	0.9		0	0	0.5	0.5	0.9	0.9		0	0	0.5	0.5	0.9	0.9
λ	TP	FP	TP	FP	TP	FP		TP	FP	TP	FP	TP	FP		TP	FP	TP	FP	TP	FP		TP	FP	TP	FP	TP	FP		TP	FP	TP	FP	TP	FP
0.1	7	0	7	0	7	0		7	0	7	0	7	0		7	0	7	0	7	0		7	0	7	0	7	0		7	0	7	0	7	0
0.111111	7	0	7	0	7	0		7	0	7	0	7	0		7	0	7	0	7	0		7	0	7	0	7	0		7	0	7	0	7	0
0.125	7	0	7	1	7	0		7	0	7	0	7	0		7	0	7	0	7	0		7	0	7	0	7	0		7	0	7	0	7	0
0.142857	7	0	7	0	7	0		7	0	7	0	7	0		7	0	7	0	7	0		7	0	7	0	7	0		7	0	7	0	7	0
0.166667	7	0	7	0	7	0		7	0	7	0	7	0		7	0	7	0	7	0		7	0	7	0	7	0		7	0	7	3	7	0
0.2	7	0	7	0	7	0		7	0	7	1	7	0		7	0	7	0	7	0		7	0	7	0	7	0		7	0	7	0	7	0
0.25	7	0	7	0	7	0		7	0	7	0	7	0		7	0	7	0	7	0		7	0	7	0	7	0		7	0	7	3	7	0
0.333333	7	0	7	0	7	0		7	0	7	0	7	0		7	0	7	1	7	0		7	0	7	0	7	0		7	0	7	1	7	0
0.5	7	0	7	0	7	0		7	0	7	3	7	0		7	0	7	3	7	0		7	0	7	1	7	0		7	0	7	4	7	0
1	7	0	6	1	7	0		7	0	7	0	7	0		7	0	7	3	7	0		7	0	7	0	7	0		7	0	7	1	7	0
1.11111	7	0	7	1	7	0		7	0	7	2	7	0		7	0	7	2	7	0		7	0	7	0	7	0		7	0	7	2	7	0
1.25	7	0	7	0	7	0		7	0	7	2	7	0		7	0	7	2	7	0		7	0	7	1	7	0		7	0	7	2	7	0
1.42857	7	0	7	0	7	0		7	0	7	0	7	0		7	0	7	3	7	0		7	0	7	0	7	0		7	0	7	2	7	0
1.66667	7	0	7	1	7	0		7	0	7	1	7	0		7	0	7	2	7	0		7	0	7	3	7	0		7	0	7	2	7	0
2	7	0	7	2	7	0		7	0	7	6	7	0		7	0	7	5	7	0		7	0	7	2	7	0		7	0	6	1	7	0
2.5	7	0	7	1	7	0		7	0	7	3	7	0		7	0	7	2	7	0		7	0	6	3	7	0		7	0	7	4	7	0
3.33333	7	0	7	2	7	0		7	0	7	2	7	0		7	0	7	5	7	0		7	0	6	3	7	0		7	0	7	2	7	0
5	7	0	6	1	7	0		7	0	7	2	7	0		7	0	7	1	7	0		7	0	4	1	7	0		7	0	7	3	7	0
10	7	0	6	5	7	0		7	0	7	4	7	0		7	0	7	3	6	0		7	0	7	2	7	0		7	0	5	1	7	0
Num Events	7							7							7							7							7
7	FN		FN		FN			FN		FN		FN			FN		FN		FN			FN		FN		FN			FN		FN		FN
	0		0		0			0		0		0			0		0		0			0		0		0			0		0		0
	0		0		0			0		0		0			0		0		0			0		0		0			0		0		0
	0		0		0			0		0		0			0		0		0			0		0		0			0		0		0
	0		0		0			0		0		0			0		0		0			0		0		0			0		0		0
	0		0		0			0		0		0			0		0		0			0		0		0			0		0		0
	0		0		0			0		0		0			0		0		0			0		0		0			0		0		0
	0		0		0			0		0		0			0		0		0			0		0		0			0		0		0
	0		0		0			0		0		0			0		0		0			0		0		0			0		0		0
	0		0		0			0		0		0			0		0		0			0		0		0			0		0		0
	0		1		0			0		0		0			0		0		0			0		0		0			0		0		0
	0		0		0			0		0		0			0		0		0			0		0		0			0		0		0
	0		0		0			0		0		0			0		0		0			0		0		0			0		0		0
	0		0		0			0		0		0			0		0		0			0		0		0			0		0		0
	0		0		0			0		0		0			0		0		0			0		0		0			0		0		0
	0		0		0			0		0		0			0		0		0			0		0		0			0		1		0
	0		0		0			0		0		0			0		0		0			0		1		0			0		0		0
	0		0		0			0		0		0			0		0		0			0		1		0			0		0		0
	0		1		0			0		0		0			0		0		0			0		3		0			0		0		0
	0		1		0			0		0		0			0		0		1			0		0		0			0		2		0		Conf	0	0	0.5	0.5	0.9	0.9	0	0	0.5	0.5	0.9	0.9
	Recall	precision	Recall	precision	Recall	precision		Recall	precision	Recall	precision	Recall	precision		Recall	precision	Recall	precision	Recall	precision		Recall	precision	Recall	precision	Recall	precision		Recall	precision	Recall	precision	Recall	precision	λ	Recall	precision	Recall	precision	Recall	precision	SEM(rec)	SEM(pre)	SEM(rec)	SEM(pre)	SEM(rec)	SEM(pre)
	1	1	1	1	1	1		1	1	1	1	1	1		1	1	1	1	1	1		1	1	1	1	1	1		1	1	1	1	1	1	0.1	1	1	1	1	1	1	0	0	0	0	0	0
	1	1	1	1	1	1		1	1	1	1	1	1		1	1	1	1	1	1		1	1	1	1	1	1		1	1	1	1	1	1	0.111111	1	1	1	1	1	1	0	0	0	0	0	0
	1	1	1	0.875	1	1		1	1	1	1	1	1		1	1	1	1	1	1		1	1	1	1	1	1		1	1	1	1	1	1	0.125	1	1	1	0.975	1	1	0	0	0	0.025	0	0
	1	1	1	1	1	1		1	1	1	1	1	1		1	1	1	1	1	1		1	1	1	1	1	1		1	1	1	1	1	1	0.142857	1	1	1	1	1	1	0	0	0	0	0	0
	1	1	1	1	1	1		1	1	1	1	1	1		1	1	1	1	1	1		1	1	1	1	1	1		1	1	1	0.7	1	1	0.166667	1	1	1	0.94	1	1	0	0	0	0.06	0	0
	1	1	1	1	1	1		1	1	1	0.875	1	1		1	1	1	1	1	1		1	1	1	1	1	1		1	1	1	1	1	1	0.2	1	1	1	0.975	1	1	0	0	0	0.025	0	0
	1	1	1	1	1	1		1	1	1	1	1	1		1	1	1	1	1	1		1	1	1	1	1	1		1	1	1	0.7	1	1	0.25	1	1	1	0.94	1	1	0	0	0	0.06	0	0
	1	1	1	1	1	1		1	1	1	1	1	1		1	1	1	0.875	1	1		1	1	1	1	1	1		1	1	1	0.875	1	1	0.333333	1	1	1	0.95	1	1	0	0	0	0.0306186	0	0
	1	1	1	1	1	1		1	1	1	0.7	1	1		1	1	1	0.7	1	1		1	1	1	0.875	1	1		1	1	1	0.636364	1	1	0.5	1	1	1	0.782273	1	1	0	0	0	0.0673909	0	0
	1	1	0.857143	0.857143	1	1		1	1	1	1	1	1		1	1	1	0.7	1	1		1	1	1	1	1	1		1	1	1	0.875	1	1	1	1	1	0.971429	0.886429	1	1	0	0	0.0285714	0.0554711	0	0
	1	1	1	0.875	1	1		1	1	1	0.777778	1	1		1	1	1	0.777778	1	1		1	1	1	1	1	1		1	1	1	0.777778	1	1	1.11111	1	1	1	0.841667	1	1	0	0	0	0.0438326	0	0
	1	1	1	1	1	1		1	1	1	0.777778	1	1		1	1	1	0.777778	1	1		1	1	1	0.875	1	1		1	1	1	0.777778	1	1	1.25	1	1	1	0.841667	1	1	0	0	0	0.0438326	0	0
	1	1	1	1	1	1		1	1	1	1	1	1		1	1	1	0.7	1	1		1	1	1	1	1	1		1	1	1	0.777778	1	1	1.42857	1	1	1	0.895556	1	1	0	0	0	0.0651304	0	0
	1	1	1	0.875	1	1		1	1	1	0.875	1	1		1	1	1	0.777778	1	1		1	1	1	0.7	1	1		1	1	1	0.777778	1	1	1.66667	1	1	1	0.801111	1	1	0	0	0	0.0333403	0	0
	1	1	1	0.777778	1	1		1	1	1	0.538462	1	1		1	1	1	0.583333	1	1		1	1	1	0.777778	1	1		1	1	0.857143	0.857143	1	1	2	1	1	0.971429	0.706899	1	1	0	0	0.0285714	0.0617497	0	0
	1	1	1	0.875	1	1		1	1	1	0.7	1	1		1	1	1	0.777778	1	1		1	1	0.857143	0.666667	1	1		1	1	1	0.636364	1	1	2.5	1	1	0.971429	0.731162	1	1	0	0	0.0285714	0.0429999	0	0
	1	1	1	0.777778	1	1		1	1	1	0.777778	1	1		1	1	1	0.583333	1	1		1	1	0.857143	0.666667	1	1		1	1	1	0.777778	1	1	3.33333	1	1	0.971429	0.716667	1	1	0	0	0.0285714	0.0396746	0	0
	1	1	0.857143	0.857143	1	1		1	1	1	0.777778	1	1		1	1	1	0.875	1	1		1	1	0.571429	0.8	1	1		1	1	1	0.7	1	1	5	1	1	0.885714	0.801984	1	1	0	0	0.0832993	0.0311163	0	0
	1	1	0.857143	0.545455	1	1		1	1	1	0.636364	1	1		1	1	1	0.7	0.857143	1		1	1	1	0.777778	1	1		1	1	0.714286	0.833333	1	1	10	1	1	0.914286	0.698586	0.971429	1	0	0	0.0571429	0.050868	0.0285714	0
			F1 Score							F1 Score							F1 Score							F1 Score							F1 Score				λ			F1 Score						SEM(F1)
			1							1							1							1							1				0.1			1						0
			1							1							1							1							1				0.111111			1						0
			0.933333							1							1							1							1				0.125			0.986667						0.0133333
			1							1							1							1							1				0.142857			1						0
			1							1							1							1							0.823529				0.166667			0.964706						0.0352941
			1							0.933333							1							1							1				0.2			0.986667						0.0133333
			1							1							1							1							0.823529				0.25			0.964706						0.0352941
			1							1							0.933333							1							0.933333				0.333333			0.973333						0.0163299
			1							0.823529							0.823529							0.933333							0.777778				0.5			0.871634						0.041062
			0.857143							1							0.823529							1							0.933333				1			0.922801						0.0361913
			0.933333							0.875							0.875							1							0.875				1.11111			0.911667						0.0248048
			1							0.875							0.875							0.933333							0.875				1.25			0.911667						0.0248048
			1							1							0.823529							1							0.875				1.42857			0.939706						0.0378087
			0.933333							0.933333							0.875							0.823529							0.875				1.66667			0.888039						0.0207421
			0.875							0.7							0.736842							0.875							0.857143				2			0.808797						0.0374949
			0.933333							0.823529							0.875							0.75							0.777778				2.5			0.831928						0.0330554
			0.875							0.875							0.736842							0.75							0.875				3.33333			0.822368						0.0322972
			0.857143							0.875							0.933333							0.666667							0.823529				5			0.831134						0.0448067
			0.666667							0.777778							0.823529							0.875							0.769231				10			0.782441						0.0345365
																																			Conf = 0.5	λ	Recall	precision	F1 Score	SEM(rec)	SEM(pre)	SEM(F1)
																																				0.1	1	1	1	0	0	0
																																				0.111111	1	1	1	0	0	0
																																				0.125	1	0.975	0.986667	0	0.025	0.0133333
																																				0.142857	1	1	1	0	0	0
																																				0.166667	1	0.94	0.964706	0	0.06	0.0352941
																																				0.2	1	0.975	0.986667	0	0.025	0.0133333
																																				0.25	1	0.94	0.964706	0	0.06	0.0352941
																																				0.333333	1	0.95	0.973333	0	0.0306186	0.0163299
																																				0.5	1	0.782273	0.871634	0	0.0673909	0.041062
																																				1	0.971429	0.886429	0.922801	0.0285714	0.0554711	0.0361913
																																				1.11111	1	0.841667	0.911667	0	0.0438326	0.0248048
																																				1.25	1	0.841667	0.911667	0	0.0438326	0.0248048
																																				1.42857	1	0.895556	0.939706	0	0.0651304	0.0378087
																																				1.66667	1	0.801111	0.888039	0	0.0333403	0.0207421
																																				2	0.971429	0.706899	0.808797	0.0285714	0.0617497	0.0374949
																																				2.5	0.971429	0.731162	0.831928	0.0285714	0.0429999	0.0330554
																																				3.33333	0.971429	0.716667	0.822368	0.0285714	0.0396746	0.0322972
																																				5	0.885714	0.801984	0.831134	0.0832993	0.0311163	0.0448067
																																				10	0.914286	0.698586	0.782441	0.0571429	0.050868	0.0345365

## Sheet: Figure 3a
eViT																Count without GNMS
Name	Detected	TP	FP	FN	HE			Precision	Recall	F1	SEM (Precision)	SEM (Recall)	SEM (F1)
c1_iLas561TIRFCube1.ome_Cell-3-ch(1)-c	9364	4	0	9360	0	4	1	1	1	1						27	27
c2_iLas561TIRFCube1.ome_Cell-2-ch(1)-c	2975	4	0	2971	0	4	1	1	1	1						33	33
c3_iLas561TIRFCube1.ome_Cell-3-ch(1)	5092	4	0	5088	0	3	1	1	1	1						21	21
c4_iLas561TIRFCube1.ome_Cell-9-ch(1)	10745	2	0	10743	0	2	1	1	1	1						10	10
C22-488	8552	16	0	8536	0	14	1	1	1	1						51	51
Cell05-1-c	1623	10	1	1612	0	7	0.999384	0.909091	1	0.952381						39	38
GT-Movie-01-SLB-GzmB phuji561-TC01	12518	4	0	12514	0	2	1	1	1	1						26	26
GT-Movie-01-SLB-GzmB phuji561-TC02	4000	14	2	3984	0	14	0.9995	0.875	1	0.933333						95	93
Movie-01-SLB-GzmB phuji561-TC02	1747	8	1	1738	0	8	0.999428	0.888889	1	0.941176						21	20
v9-61TIRFCube1_t2-c	16771	7	0	16764	0	7	1	1	1	1						41	41
GzmB-phuji_1	7163	4	0	7159	0	4	1	1	1	1						18	18
GzmB-phuji_2	582	3	0	579	0	3	1	1	1	1						16	16
GzmB-phuji_3	5400	4	0	5395	1	5	0.999815	1	0.8	0.888889						19	19
Total	86532	84	4	73310	1	77	0.999831	0.974845	0.984615	0.978137	8.19856e-05	0.0128737	0.0147811	0.00982208	13	417	413
																	GNMS= gaussian non maximum suppression for discarding event duplicates
LSTM
Name	Detected	TP	FP	FN	HE			Precision	Recall	F1	SEM (Precision)	SEM (Recall)	SEM (F1)
c1_iLas561TIRFCube1.ome_Cell-3-ch(1)-c	9364	2	0	9360	2	4	0.999786	1	0.5	0.666667
c2_iLas561TIRFCube1.ome_Cell-2-ch(1)-c	2975	3	0	2971	1	4	0.999664	1	0.75	0.857143
c3_iLas561TIRFCube1.ome_Cell-3-ch(1)	5092	4	0	5088	0	3	1	1	1	1
c4_iLas561TIRFCube1.ome_Cell-9-ch(1)	10745	2	0	10743	0	2	1	1	1	1
C22-488	8552	14	0	8536	2	14	0.999766	1	0.875	0.933333
Cell05-1-c	1623	9	0	1614	0	7	1	1	1	1
GT-Movie-01-SLB-GzmB phuji561-TC01	12518	1	0	12517	0	2	1	1	1	1
GT-Movie-01-SLB-GzmB phuji561-TC02	4000	13	1	3985	1	14	0.9995	0.928571	0.928571	0.928571
Movie-01-SLB-GzmB phuji561-TC02	1747	5	1	1738	3	8	0.99771	0.833333	0.625	0.714286
v9-61TIRFCube1_t2-c	16771	6	0	16764	1	7	0.99994	1	0.857143	0.923077
GzmB-phuji_1	7163	3	3	7156	1	4	0.999442	0.5	0.75	0.6
GzmB-phuji_2	582	3	0	579	0	3	1	1	1	1
GzmB-phuji_3	5414	5	0	5409	0	5	1	1	1	1
Total	86546	70	5	86460	11	77	0.999678	0.943223	0.868132	0.894083	0.000166229	0.0377608	0.0442358	0.0379018
ExoJ
Name		TP	FP	FN	HE			Precision	Recall	F1	SEM (Precision)	SEM (Recall)	SEM (F1)
c1_iLas561TIRFCube1.ome_Cell-3-ch(1)-c	4	1	0	0	3	4	0.25	1	0.25	0.4
c2_iLas561TIRFCube1.ome_Cell-2-ch(1)-c	4	1	0	0	3	4	0.25	1	0.25	0.4
c3_iLas561TIRFCube1.ome_Cell-3-ch(1)	4	1	1	0	3	3	0.2	0.5	0.25	0.333333
c4_iLas561TIRFCube1.ome_Cell-9-ch(1)	2	1	0	0	1	2	0.5	1	0.5	0.666667
C22-488	16	5	4	0	11	14	0.25	0.555556	0.3125	0.4
Cell05-1-c	10	3	3	0	7	7	0.230769	0.5	0.3	0.375
GT-Movie-01-SLB-GzmB phuji561-TC01	4	0	1	0	4	2	0	0	0	0.01
GT-Movie-01-SLB-GzmB phuji561-TC02	14	3	1	0	11	14	0.2	0.75	0.214286	0.333333
Movie-01-SLB-GzmB phuji561-TC02	8	6	1	0	2	8	0.666667	0.857143	0.75	0.8
GzmB-phuji_1	4	1	1	0	3	4	0.2	0.5	0.25	0.333333
GzmB-phuji_2	3	0	3	0	3	3	0	0	0	0.01
GzmB-phuji_3	4	3	0	0	2	5	0.6	1	0.6	0.75
v9-61TIRFCube1_t2-c	7	1	0	0	6	7	0.142857	1	0.142857	0.25
Total	84	26	15	0	59	77	0.268484	0.666361	0.293819	0.389359	0.0543122	0.0967932	0.0572651	0.0640265
SigmaPlot statistics
Kruskal-Wallis One Way Analysis of Variance on Ranks							Kruskal-Wallis One Way Analysis of Variance on Ranks							Kruskal-Wallis One Way Analysis of Variance on Ranks
Data source: Fig_3a in Notebook1							Data source: Fig_3a in Notebook1							Data source: Fig_3a in Notebook1
Group	N	Missing	Median	0.25	0.75		Group	N	Missing	Median	0.25	0.75		Group	N	Missing	Median	0.25	0.75
eVit Precision	13	0	1	0.955	1		eVit Recall	13	0	1	1	1		eVit F1	13	0	1	0.945	1
LSTM Precision	13	0	1	0.965	1		LSTM Recall	13	0	0.93	0.75	1		LSTM F1	13	0	0.93	0.785	1
ExoJ Precision	13	0	0.75	0.5	1		ExoJ Recall	13	0	0.25	0.176	0.405		ExoJ F1	13	0	0.38	0.29	0.535
H = 8.440 with 2 degrees of freedom. (P = 0.015)							H = 28.969 with 2 degrees of freedom. (P = <0.001)							H = 25.967 with 2 degrees of freedom. (P = <0.001)
The differences in the median values among the treatment groups are greater than would be expected by chance; there is a statistically significant difference (P = 0.015)							The differences in the median values among the treatment groups are greater than would be expected by chance; there is a statistically significant difference (P = <0.001)							The differences in the median values among the treatment groups are greater than would be expected by chance; there is a statistically significant difference (P = <0.001)
To isolate the group or groups that differ from the others use a multiple comparison procedure.							To isolate the group or groups that differ from the others use a multiple comparison procedure.							To isolate the group or groups that differ from the others use a multiple comparison procedure.
All Pairwise Multiple Comparison Procedures (Dunn's Method) :							All Pairwise Multiple Comparison Procedures (Dunn's Method) :							All Pairwise Multiple Comparison Procedures (Dunn's Method) :
Comparison	Diff of Ranks	Q	P	P<0.050			Comparison	Diff of Ranks	Q	P	P<0.050			Comparison	Diff of Ranks	Q	P	P<0.050
eVit Precisio vs ExoJ Precisio	9.962	2.227	0.078	No			eVit Recall vs ExoJ Recall	22.192	4.962	<0.001	Yes			eVit F1 vs ExoJ F1	21.192	4.739	<0.001	Yes
eVit Precisio vs LSTM Precisio	0.654	0.146	1	Do Not Test			eVit Recall vs LSTM Recall	6.423	1.436	0.453	No			eVit F1 vs LSTM F1	5.115	1.144	0.758	No
LSTM Precisio vs ExoJ Precisio	9.308	2.081	0.112	Do Not Test			LSTM Recall vs ExoJ Recall	15.769	3.526	0.001	Yes			LSTM F1 vs ExoJ F1	16.077	3.595	<0.001	Yes

## Sheet: Figure 3b
eViT																	Count without GNMS
Name	Detected	TP	FP	FN	HE			Precision	Recall	F1	SEM (Precision)	SEM (Recall)	SEM (F1)
cell5-11 GzmB KI tomato halGzmB mTFP cell2-8cf fusion	619	7	0	0	7			1	1	1					24		24
GzmB mTFP cell2-8c	6333	62	8	0	47			0.885714	1	0.939394					212		204
GzmB mTFP cell3-1	7911	56	13	0	37			0.811594	1	0.896					187		174
GzmB tomato cell5-1-c	1971	21	9	0	18			0.7	1	0.823529					84		75
GzmB tomato Cell6-1	12446	49	9	0	40			0.844828	1	0.915888					484		475
GzmB tomato-cell2-1	8454	15	7	0	12			0.681818	1	0.810811					113		106
cell38_gzmB KI secretion C	3294	9	3	0	7			0.75	1	0.857143					43		40
Total	41028	219	49	0	168			0.810565	1	0.891824	0.039169	0	0.0234701	50	1147		1098
																	GNMS= gaussian non maximum suppression for discarding event duplicates
LSTM
Name	Detected	TP	FP	FN	HE			Precision	Recall	F1	SEM (Precision)	SEM (Recall)	SEM (F1)
cell5-11 GzmB KI tomato halGzmB mTFP cell2-8cf fusion	809	7	0	0	7			1	1	1
GzmB mTFP cell2-8c	4188	49	6	0	47			0.890909	1	0.942308
GzmB mTFP cell3-1	5701	42	9	14	37			0.823529	0.75	0.785047
GzmB tomato cell5-1-c	1971	15	2	6	18			0.882353	0.714286	0.789474
GzmB tomato Cell6-1	12446	38	2	11	40			0.95	0.77551	0.853933
GzmB tomato-cell2-1	8454	12	2	0	12			0.857143	1	0.923077
cell38_gzmB KI secretion C	3294	9	2	0	7			0.818182	1	0.9
Total	36863	172	23	31	168			0.888874	0.891399	0.884834	0.0232143	0.0478027	0.0279449
ExoJ
Name		TP	FP	FN	HE			Precision	Recall	F1	SEM (Precision)	SEM (Recall)	SEM (F1)
cell5-11 GzmB KI tomato halGzmB mTFP cell2-8cf fusion		1	2	6	7			0.333333	0.142857	0.2
GzmB mTFP cell2-8c		0	1	62	50			0	0	0.0001
GzmB mTFP cell3-1		6	50	50	37			0.107143	0.107143	0.107143
GzmB tomato cell5-1-c		4	36	17	23			0.1	0.190476	0.131148
GzmB tomato Cell6-1		0	1	49	48			0	0	0.0001
GzmB tomato-cell2-1		1	9	14	26			0.1	0.0666667	0.08
cell38_gzmB KI secretion C		1	6	8	7			0.142857	0.111111	0.125
Total		13	105	206	198			0.111905	0.088322	0.0919272	0.0392117	0.024889	0.0253748
SigmaPlot statistics
One Way Analysis of Variance							Kruskal-Wallis One Way Analysis of Variance on Ranks								One Way Analysis of Variance
Data source: Fig_3b in eViT vs LSTM vs ExoJ.JNB							Data source: Fig_3b in eViT vs LSTM vs ExoJ.JNB								Data source: Fig_3b in eViT vs LSTM vs ExoJ.JNB
Normality Test (Shapiro-Wilk):	Passed	(P = 0.140)					Group	N	Missing	Median	0.25	0.75			Normality Test (Shapiro-Wilk):	Passed	(P = 0.083)
Equal Variance Test (Brown-Forsythe):	Passed	(P = 0.428)					eViT Recall	7	0	1	1	1			Equal Variance Test (Brown-Forsythe):				Passed	(P = 0.895)
Group Name							LSTM Recall	7	0	1	0.75	1			Group Name
eViT Precision	N	Missing	Mean	Std Dev	SEM		ExoJ Recall	7	0	0.11	0	0.14			eViT F1	N	Missing	Mean	Std Dev	SEM
LSTM Precision	7	0	0.81	0.113	0.0425										LSTM F1	7	0	0.893	0.068	0.0257
ExoJ Precision	7	0	0.889	0.0664	0.0251		H = 16.571 with 2 degrees of freedom. (P = <0.001)								ExoJ F1	7	0	0.884	0.0785	0.0297
	7	0	0.111	0.111	0.0419											7	0	0.0929	0.073	0.0276
Source of Variation							The differences in the median values among the treatment groups are greater than would be expected by chance; there is a statistically significant difference (P = <0.001)								Source of Variation
Between Groups	DF	SS	MS	F	P										Between Groups	DF	SS	MS	F	P
Residual	2	2.562	1.281	130.899	<0.001		To isolate the group or groups that differ from the others use a multiple comparison procedure.								Residual	2	2.955	1.478	275.149	<0.001
Total	18	0.176	0.00979												Total	18	0.0967	0.00537
	20	2.738														20	3.052
The differences in the mean values among the treatment groups are greater than would be expected by chance; there is a statistically significant difference (P = <0.001).							All Pairwise Multiple Comparison Procedures (Dunn's Method) :								The differences in the mean values among the treatment groups are greater than would be expected by chance; there is a statistically significant difference (P = <0.001).
Power of performed test with alpha = 0.050: 1.000							Comparison	Diff of Ranks	Q	P	P<0.050				Power of performed test with alpha = 0.050: 1.000
							eViT Recall vs ExoJ Recall	12	3.618	<0.001	Yes
All Pairwise Multiple Comparison Procedures (Holm-Sidak method):							eViT Recall vs LSTM Recall	3	0.905	1	No				All Pairwise Multiple Comparison Procedures (Holm-Sidak method):
Overall significance level = 0.05							LSTM Recall vs ExoJ Recall	9	2.714	0.02	Yes				Overall significance level = 0.05
Comparisons for factor:															Comparisons for factor:
Comparison															Comparison
LSTM Precisi vs. ExoJ Precisi	Diff of Means	t	P	P<0.050											eViT F1 vs. ExoJ F1	Diff of Means	t	P	P<0.050
eViT Precisi vs. ExoJ Precisi	0.777	14.696	<0.001	Yes											LSTM F1 vs. ExoJ F1	0.8	20.424	<0.001	Yes
LSTM Precisi vs. eViT Precisi	0.699	13.21	<0.001	Yes											eViT F1 vs. LSTM F1	0.791	20.205	<0.001	Yes
	0.0786	1.486	0.155	No												0.00857	0.219	0.829	No

## Sheet: Figure 3c
eViT																Count without GNMS
Name	Detected	TP	FP	FN	HE			Precision	Recall	F1	SEM (Precision)	SEM (Recall)	SEM (F1)
CD9-pHluorin - HeLa Cell	892	75	7	807	3	64	0.988789	0.914634	0.961538	0.9375						94	93
A	753	4	0	749	0	4	1	1	1	1						10	10
B	536	2	0	534	0	2	1	1	1	1						2	2
C2	411	10	0	400	1	11	0.997567	1	0.909091	0.952381						21	20
D	434	2	0	432	0	2	1	1	1	1						5	5
E1	281	3	0	278	0	3	1	1	1	1						4	4
Total	13488	80	8	13397	3	80	0.999084	0.939197	0.978749	0.956888	0.000411919	0.021542	0.0139967	0.0143214	11	621	610
																	GNMS= gaussian non maximum suppression for discarding event duplicates
LSTM
Name	Detected	TP	FP	FN	HE			Precision	Recall	F1	SEM (Precision)	SEM (Recall)	SEM (F1)
CD9-pHluorin - HeLa Cell	876	60	20	782	14	64	0.961187	0.75	0.810811	0.779221						94	60
A	763	4	0	759	0	4	1	1	1	1						10	10
B	497	2	0	495	0	2	1	1	1	1						2	2
C2	416	7	21	384	4	11	0.939904	0.25	0.636364	0.358974						21	-4
D	434	2	0	432	0	2	1	1	1	1						5	5
E1	274	3	1	270	0	3	0.99635	0.75	1	0.857143						4	3
Total	3260	78		3122	18	86	0.982907	0.791667	0.907862	0.832556	0.00968713	0.108919	0.0570302	0.0930712	6	136	76
ExoJ
Name		TP	FP	FN	HE			Precision	Recall	F1	SEM (Precision)	SEM (Recall)	SEM (F1)
CD9-pHluorin - HeLa Cell	74	65	6	0	3	64	0.878378	0.915493	0.955882	0.935252
A	753	4	0	749	0	4	1	1	1	1
B	536	1	2	533	0	2	0.996269	0.333333	1	0.5
C2	411	9	0	400	2	11	0.995134	1	0.818182	0.9
D	434	2	0	432	0	2	1	1	1	1
E1	281	1	0	280	0	3	1	1	1	1
Total	2489	82	8	2394	5	86	0.978297	0.874804	0.962344	0.889209	0.0182599	0.0996581	0.0271295	0.0727522
SigmaPlot statistics
Kruskal-Wallis One Way Analysis of Variance on Ranks							Kruskal-Wallis One Way Analysis of Variance on Ranks							Kruskal-Wallis One Way Analysis of Variance on Ranks
Data source: Fig_3c in Notebook1							Data source: Fig_3c in Notebook1							Data source: Fig_3c in Notebook1
Group	N	Missing	Median	0.25	0.75		Group	N	Missing	Median	0.25	0.75		Group	N	Missing	Median	0.25	0.75
eVit Precision	6	0	1	0.978	1		eVit Recall	6	0	1	0.948	1		eVit F1	6	0	1	0.947	1
LSTM Precision	6	0	0.875	0.625	1		LSTM Recall	6	0	1	0.767	1		LSTM F1	6	0	0.929	0.674	1
ExoJ Precision	6	0	1	0.77	1		ExoJ Recall	6	0	1	0.921	1		ExoJ F1	6	0	0.968	0.8	1
H = 2.023 with 2 degrees of freedom. (P = 0.364)							H = 0.216 with 2 degrees of freedom. (P = 0.898)							H = 20.991 with 2 degrees of freedom. (P = <0.001)
The differences in the median values among the treatment groups are not great enough to exclude the possibility that the difference is due to random sampling variability; there is not a statistically significant difference (P = 0.364)							The differences in the median values among the treatment groups are not great enough to exclude the possibility that the difference is due to random sampling variability; there is not a statistically significant difference (P = 0.898)							The differences in the median values among the treatment groups are not great enough to exclude the possibility that the difference is due to random sampling variability; there is not a statistically significant difference (P = 0.447)

## Sheet: Figure 3d
eViT																Count without GNMS
Name	Detected	TP	FP	FN	HE			Precision	Recall	F1	SEM (Precision)	SEM (Recall)	SEM (F1)
101018_C02_S0_L568_F0_5min wc	333	35	3	0	28			0.921053	1	0.958904					42	39
101018_C05_S2_L568_F0_5min wc	1952	97	15	0	76			0.866071	1	0.92823					175	160
101213_C01_S0_L568_F0_5min wc	5906	16	6	0	14			0.727273	1	0.842105					31	25
101214_C01_S1_L568_F0_5min wc	1639	34	7	0	34			0.829268	1	0.906667					52	45
101102_C04_S0_L568_F0_5min_wc-c153	239	28	3	2	30			0.903226	0.933333	0.918033					50	45
0881 mcherry 10Hz	2789	62	10	3	29			0.861111	0.953846	0.905109					90	77
1533 mcherry 10Hz	2143	56	15	4	36			0.788732	0.933333	0.854962					67	48
1534 mcherry 10Hz	3648	57	22	0	32			0.721519	1	0.838235					84	62
1537 mcherry 10Hz	959	15	11	0	10			0.576923	1	0.731707					29	18
0880 mcherry 10Hz	192	12	7	0	3			0.631579	1	0.774194					23	16
Total	19800	412	99	9	292			0.782676	0.982051	0.865815	0.0347806	0.0664369	0.0980933	52	643	535
																GNMS= gaussian non maximum suppression for discarding event duplicates
LSTM
Name	Detected	TP	FP	FN	HE			Precision	Recall	F1	SEM (Precision)	SEM (Recall)	SEM (F1)
101018_C02_S0_L568_F0_5min wc	333	9	1	26	28			0.9	0.257143	0.4
101018_C05_S2_L568_F0_5min wc	1952	30	2	67	76			0.9375	0.309278	0.465116
101213_C01_S0_L568_F0_5min wc	5906	9	0	7	14			1	0.5625	0.72
101214_C01_S1_L568_F0_5min wc	1639	7	0	27	34			1	0.205882	0.341463
101102_C04_S0_L568_F0_5min_wc-c153	239	13	1	17	30			0.928571	0.433333	0.590909
0881 mcherry 10Hz	2789	13	0	47	29			1	0.216667	0.356164
1533 mcherry 10Hz	2143	13	0	43	36			1	0.232143	0.376812
1534 mcherry 10Hz	3648	11	1	46	32			0.916667	0.192982	0.318841
1537 mcherry 10Hz	959	2	1	13	10			0.666667	0.133333	0.222222
0880 mcherry 10Hz	192	3	0	10	3			1	0.230769	0.375
Total	19800	110	6	303	292			0.93494	0.277403	0.416653	0.0347806	0.0664369	0.0980933
ExoJ
Name		TP	FP	FN	HE			Precision	Recall	F1	SEM (Precision)	SEM (Recall)	SEM (F1)
101018_C02_S0_L568_F0_5min wc		0	1	30	30			0	0	#DIV/0!
101018_C05_S2_L568_F0_5min wc		0	1	76	76			0	0	#DIV/0!
101213_C01_S0_L568_F0_5min wc		0	2	14	14			0	0	#DIV/0!
101214_C01_S1_L568_F0_5min wc0		0	3	2	2			0	0	#DIV/0!
101102_C04_S0_L568_F0_5min_wc-c153		0	1	30	30			0	0	#DIV/0!
0881 mcherry 10Hz		1	9	28	29			0.1	0.0344828	0.0512821
1533 mcherry 10Hz		0	5	36	36			0	0	#DIV/0!
1534 mcherry 10Hz		3	6	29	32			0.333333	0.09375	0.146341
1537 mcherry 10Hz		0	1	10	10			0	0	#DIV/0!
0880 mcherry 10Hz		0	2	3	3			0	0	#DIV/0!
Total		4	31	258	262			0.0433333	0.0128233	#DIV/0!	0.0347806	0.0664369	0.0980933
SigmaPlot statistics
Kruskal-Wallis One Way Analysis of Variance on Ranks							Kruskal-Wallis One Way Analysis of Variance on Ranks							Wilcoxon Signed Rank Test
Data source: Fig_3d in eViT vs LSTM vs ExoJ.JNB							Data source: Fig_3d in eViT vs LSTM vs ExoJ.JNB							Data source: Fig_3d in eViT vs LSTM vs ExoJ.JNB
Group	N	Missing	Median	0.25	0.75		Group	N	Missing	Median	0.25	0.75		Group	N	Missing	Median	0.25	0.75
eViT Precision	10	0	0.81	0.698	0.877		eViT Recall	10	0	1	0.945	1		eViT F1	10	0	0.88	0.823	0.922
LSTM Precision	10	0	0.97	0.915	1		LSTM Recall	10	0	0.23	0.205	0.34		LSTM F1	10	0	0.38	0.335	0.5
ExoJ Precision	10	0	0	0	0.025		ExoJ Recall	10	0	0	0	0.0075
H = 24.051 with 2 degrees of freedom. (P = <0.001)							H = 26.648 with 2 degrees of freedom. (P = <0.001)							W= -55.000 T+ = 0.000 T-= -55.000
The differences in the median values among the treatment groups are greater than would be expected by chance; there is a statistically significant difference (P = <0.001)							The differences in the median values among the treatment groups are greater than would be expected by chance; there is a statistically significant difference (P = <0.001)							Z-Statistic (based on positive ranks) = -2.803
To isolate the group or groups that differ from the others use a multiple comparison procedure.							To isolate the group or groups that differ from the others use a multiple comparison procedure.							Yates continuity correction option not applied to calculations.
All Pairwise Multiple Comparison Procedures (Dunn's Method) :							All Pairwise Multiple Comparison Procedures (Dunn's Method) :							P(est.)= 0.005 P(exact)= 0.002
														The change that occurred with the treatment is greater than would be expected by chance; there is a statistically significant difference (P = 0.002).
Comparison	Diff of Ranks	Q	P	P<0.050			Comparison	Diff of Ranks	Q	P	P<0.050
LSTM Precisio vs ExoJ Precisio	19	4.826	<0.001	Yes			eViT Recall vs ExoJ Recall	20	5.08	<0.001	Yes
LSTM Precisio vs eViT Precisio	8	2.032	0.126	No			eViT Recall vs LSTM Recall	10	2.54	0.033	Yes
eViT Precisio vs ExoJ Precisio	11	2.794	0.016	Yes			LSTM Recall vs ExoJ Recall	10	2.54	0.033	Yes

## Sheet: Figure 3e
eViT																Count without GNMS
Name	Detected	TP	FP	FN	HE			Precision	Recall	F1	SEM (Precision)	SEM (Recall)	SEM (F1)
0680 EGFP 10Hz	2411	21	3	2	18			0.875	0.913043	0.893617					38	33
0681 EGFP 10Hz	497	64	16	2	38			0.8	0.969697	0.876712					69	51
0682 EGFP 10Hz-c-2	55	16	0	0	11			1	1	1					17	17
1852 EGFP 10Hz	53	8	1	0	5			0.888889	1	0.941176					10	9
1857 EGFP 10Hz	338	52	3	0	42			0.945455	1	0.971963					63	60
6061 neon 50Hz	902	7	0	0	7			1	1	1					13	13
6059 neon 50Hz	605	28	3	0	13			0.903226	1	0.949153					33	30
6062 neon 50Hz	1102	11	1	0	8			0.916667	1	0.956522					24	23
6063 neon 50Hz	2331	7	2	0	5			0.777778	1	0.875					12	10
Total	8294	214	29	4	147			0.900779	0.986971	0.94046	0.0243522	0.00926426	0.0152993	56	279	246
																GNMS= gaussian non maximum suppression for discarding event duplicates
LSTM
Name	Detected	TP	FP	FN	HE			Precision	Recall	F1	SEM (Precision)	SEM (Recall)	SEM (F1)
0680 EGFP 10Hz	2411	10	20	11	18			0.333333	0.47619	0.392157
0681 EGFP 10Hz	497	27	5	37	38			0.84375	0.421875	0.5625
0682 EGFP 10Hz-c-2	55	7	1	9	11			0.875	0.4375	0.583333
1852 EGFP 10Hz	53	2	0	6	5			1	0.25	0.4
1857 EGFP 10Hz	338	9	17	43	42			0.346154	0.173077	0.230769
6061 neon 50Hz	902	1	0	6	7			1	0.142857	0.25
6059 neon 50Hz	605	5	0	23	13			1	0.178571	0.30303
6062 neon 50Hz	1102	2	1	9	8			0.666667	0.181818	0.285714
6063 neon 50Hz	2331	3	0	4	5			1	0.428571	0.6
Total	8294	66	44	148	147			0.784989	0.29894	0.400834	0.08657	0.0435094	0.0463049
ExoJ
Name		TP	FP	FN	HE			Precision	Recall	F1	SEM (Precision)	SEM (Recall)	SEM (F1)
0680 EGFP 10Hz		0	1	18	18			0	0	#DIV/0!
0681 EGFP 10Hz		0	1	38	38			0	0	#DIV/0!
0682 EGFP 10Hz-c-2		0	1	11	11			0	0	#DIV/0!
1852 EGFP 10Hz		1	3	4	5			0.25	0.2	0.222222
1857 EGFP 10Hz		4	5	38	42			0.444444	0.0952381	0.156863
6061 neon 50Hz		2	0	5	7			1	0.285714	0.444444
6059 neon 50Hz		1	2	12	13			0.333333	0.0769231	0.125
6062 neon 50Hz		0	1	8	8			0	0	#DIV/0!
6063 neon 50Hz		0	1	5	5			0	0	#DIV/0!
Total		8	15	139	147			0.225309	0.0730973	#DIV/0!	0.106241	0.0330602	#DIV/0!
SigmaPlot statistics
One Way Analysis of Variance							One Way Analysis of Variance							Paired t-test:
Data source: Fig_3e in eViT vs LSTM vs ExoJ.JNB							Data source: Fig_3e in eViT vs LSTM vs ExoJ.JNB							Data source: Fig_3e in eViT vs LSTM vs ExoJ.JNB
Normality Test (Shapiro-Wilk):	Passed	(P = 0.086)					Normality Test (Shapiro-Wilk):		Failed (P < 0.050)					Normality Test (Shapiro-Wilk):			Passed (P = 0.589)
Equal Variance Test (Brown-Forsythe):	Passed	(P = 0.105)												Treatment Name	N	Missing	Mean	Std Dev	SEM
							Test execution ended by user request, ANOVA on Ranks begun							eViT F1	8	0	0.949	0.0449	0.0159
Group Name	N	Missing	Mean	Std Dev	SEM									LSTM F1	8	0	0.375	0.134	0.0475
eViT Precision	8	0	0.917	0.0665	0.0235		Kruskal-Wallis One Way Analysis of Variance on Ranks	Monday, 29 July 2024 13:36:49						Difference	8	0	0.574	0.155	0.0548
LSTM Precision	8	0	0.759	0.281	0.0995
ExoJ Precision	8	0	0.253	0.349	0.124		Data source: Fig_3e in eViT vs LSTM vs ExoJ.JNB							t = 10.463 with 7 degrees of freedom.
Source of Variation	DF	SS	MS	F	P		Group	N	Missing	Median	0.25	0.75		95 percent two-tailed confidence interval for difference of means: 0.444 to 0.703
Between Groups	2	1.93	0.965	14.067	<0.001		eViT Recall	8	0	1	0.978	1
Residual	21	1.441	0.0686				LSTM Recall	8	0	0.215	0.172	0.435		Two-tailed P-value = 0.0000159
Total	23	3.37					ExoJ Recall	8	0	0.04	0	0.175
														The change that occurred with the treatment is greater than would be expected by chance; there is a statistically significant change (P = <0.001)
The differences in the mean values among the treatment groups are greater than would be expected by chance; there is a statistically significant difference (P = <0.001).							H = 18.372 with 2 degrees of freedom. (P = <0.001)
														One-tailed P-value = 0.00000793
Power of performed test with alpha = 0.050: 0.993							The differences in the median values among the treatment groups are greater than would be expected by chance; there is a statistically significant difference (P = <0.001)
														The sample mean of treatment eViT F1 exceeds the sample mean of treatment LSTM F1 by an amount that is greater than would be expected by chance, rejecting the hypothesis that the population mean of treatment LSTM F1 is greater than or equal to the population mean of treatment eViT F1. (P = <0.001)
All Pairwise Multiple Comparison Procedures (Holm-Sidak method):							To isolate the group or groups that differ from the others use a multiple comparison procedure.
Overall significance level = 0.05
Comparisons for factor:							All Pairwise Multiple Comparison Procedures (Dunn's Method) :
Comparison	Diff of Means	t	P	P<0.050
eViT Precisi vs. ExoJ Precisi	0.665	5.078	<0.001	Yes			Comparison	Diff of Ranks	Q	P	P<0.050
LSTM Precisi vs. ExoJ Precisi	0.506	3.866	0.002	Yes			eViT Recall vs ExoJ Recall	14.875	4.207	<0.001	Yes
eViT Precisi vs. LSTM Precisi	0.159	1.212	0.239	No			eViT Recall vs LSTM Recall	9.125	2.581	0.03	Yes
							LSTM Recall vs ExoJ Recall	5.75	1.626	0.312	No
							Note: The multiple comparisons on ranks do not include an adjustment for ties.

## Sheet: Figure 3 overall
eViT
Type	Accuracy	Precision	Recall	F1		Type	Selected regions	Count without GNMS	With GNMS	HE
Fig 3a: CTL (GzmB-pHuji)	0.998581	0.817058	0.992369	0.893058		Fig 3a: CTL (GzmB-pHuji)	41028	1098	219	168
Fig 3b: CTL (GzmB-tdTomato)	0.999831	0.974845	0.984615	0.978137		Fig 3b: CTL (GzmB-tdTomato)	86532	413	84	77
Fig 3c: CTL (CD63-pHuji)	0.997898	0.985772	0.978438	0.981647		Fig 3c: CTL (CD63-pHuji)	3299	126	96	86
Fig 4d: CC+INS1 mCherry	0.988961	0.782676	0.982051	0.865815		Fig 4d: CC+INS1 mCherry	19800	535	412	292
Fig 4e: INS1 NeonGreen+mGFP	0.991916	0.900779	0.986971	0.94046		Fig 4e: INS1 NeonGreen+mGFP	8294	246	214	147
Avg	0.995437	0.892226	0.984889	0.931823		Total	158953	2418	1025	770
SEM	0.00189295	0.0364973	0.00209787	0.0205542		Sub	156535	1393	255
							≈ True Netagive	Dup-True	True-HE
LSTM							GNMS= gaussian non maximum suppression for discarding event duplicates
Type	Accuracy	Precision	Recall	F1
Fig 3a: CTL (GzmB-pHuji)	0.999631	0.97619	0.853571	0.902308
Fig 3b: CTL (GzmB-tdTomato)	0.998369	0.888874	0.891399	0.884834
Fig 3c: CTL (CD63-pHuji)
Fig 4d: CC+INS1 mCherry	0.967412	0.93494	0.277403	0.416653
Fig 4e: INS1 NeonGreen+mGFP	0.930515	0.784989	0.29894	0.400834
Avg	0.973982	0.896248	0.580329	0.651157
SEM	0.0141093	0.0356377	0.146281	0.121278
ExoJ
Type	Accuracy	Precision	Recall	F1
Fig 3a: CTL (GzmB-pHuji)	0.255122	0.705556	0.286845	0.384644
Fig 3b: CTL (GzmB-tdTomato)	0.0504811	0.111905	0.0943216	0.0935184
Fig 3c: CTL (CD63-pHuji)
Fig 4d: CC+INS1 mCherry	0.0105263	0.0433333	0.0128233	0.01
Fig 4e: INS1 NeonGreen+mGFP	0.0624986	0.225309	0.0730973	0.01
Avg	0.0946571	0.271526	0.116772	0.124541
SEM	0.0473107	0.129438	0.0513211	0.0769964
SigmaPlot statistics

## Sheet: Figure 4
Name	Detected	Stim1	nonSync	HE	TP	FP	FP stim	FP nonSync	FN	Single	Synapse	precision	Recall	F1 Score	SEM(pre)	SEM(rec)	SEM(F1)	Type	total	Ratio (TP/HE)
DRG08	2249	50	181	66	238	7	3	4	16	219	212	0.971429	0.937008	0.953908				HE	705	2.80709
PREP03	3150	26	97	26	130	7	3	4	7	124	117	0.948905	0.948905	0.948905				Synapse	1706
DRG02	1429	23	103	45	128	2	2	0	17	116	114	0.984615	0.882759	0.930909				Stim1	1124
im02 Set1	11437	74	99	33	183	10	2	8	7	155	145	0.948187	0.963158	0.955614				NonSync	855
im04 Set1	14731	303	135	80	448	10	4	6	10	373	363	0.978166	0.978166	0.978166				Nominated	169714
im09 Set1	7737	238	35	106	283	10	8	2	22	249	239	0.96587	0.927869	0.946488				Sync & nonSync	1979
im03 Set2	10053	53	12	50	69	4	2	2	31	56	52	0.945205	0.69	0.797688				False positive	71
im05 Set2	6115	172	9	158	185	4	3	1	47	130	126	0.978836	0.797414	0.87886				Accuracy	0.96371
im06 Set2	12389	70	33	69	109	6	2	4	36	98	92	0.947826	0.751724	0.838462
im09 Set2	10537	71	94	37	174	9	3	6	15	161	152	0.95082	0.920635	0.935484
im10 Set2	5030	44	57	35	103	2	2	0	12	96	94	0.980952	0.895652	0.936364
Values	84857	1124	855	705	2050	71	34	37	220	1777	1706	0.96371	0.881208	0.918259	0.00450655	0.0269839	0.0160662
			HE vs TP paired Student t-Test: p =	0.00216878

## Sheet: Supp. Figure 4
eViT
Name	Detected	TP	FP	FN	HE			Precision	Recall	F1	SEM (Precision)	SEM (Recall)	SEM (F1)
CMV-21J-LTR-001-C1	948	11	2	0	10			0.846154	1	0.916667
CMV-21J-LTR-001-C2	954	5	3	0	5			0.625	1	0.769231
CMV-21J-LTR-005-C2	166	9	4	0	8			0.692308	1	0.818182
CMV-21J-LTR-009_Cell-4-ch(1)	1836	2	2	0	2			0.5	1	0.666667
Total	3904	27	11	0	25			0.665865	1	0.792686	0.0624422	0	0.0450363

## Sheet: Supp. Figure 15
=== Evaluating Model: Original ===	Column1	_1	_2	_3	_4
Binary Accuracy: 0.9644
Confusion Matrix:
1442	25
66	1025
Classification Report:
	precision	recall	f1-score	support
Non-Exocytosis	0.96	0.98	0.97	1467
Exocytosis	0.98	0.94	0.96	1091
accuracy	0.96	2558
macro	avg	0.97	0.96	0.96	2558
weighted	avg	0.96	0.96	0.96	2558
precision recall f1-score support Non-Exocytosis 0.96 0.98 0.97 1467 Exocytosis 0.98 0.94 0.96 1091 accuracy 0.96 2558 macro avg 0.97 0.96 0.96 2558 weighted avg 0.96 0.96 0.96 2558
=== Evaluating Model: no MLP ===
Binary Accuracy: 0.9453
Confusion Matrix:
1443	24
116	975
Classification Report:
	precision	recall	f1-score	support
Non-Exocytosis	0.93	0.98	0.95	1467
Exocytosis	0.98	0.89	0.93	1091
accuracy	0.95	2558
macro	avg	0.95	0.94	0.94	2558
weighted	avg	0.95	0.95	0.94	2558
precision recall f1-score support Non-Exocytosis 0.93 0.98 0.95 1467 Exocytosis 0.98 0.89 0.93 1091 accuracy 0.95 2558 macro avg 0.95 0.94 0.94 2558 weighted avg 0.95 0.95 0.94 2558
>>> Evaluating Model: no Spatial convolution <<<
Binary Accuracy: 0.9496
Confusion Matrix:
1443	24
105	986
Classification Report:
	precision	recall	f1-score	support
Non-Exocytosis	0.93	0.98	0.96	1467
Exocytosis	0.98	0.9	0.94	1091
accuracy	0.95	2558
macro	avg	0.95	0.94	0.95	2558
weighted	avg	0.95	0.95	0.95	2558
precision recall f1-score support Non-Exocytosis 0.93 0.98 0.96 1467 Exocytosis 0.98 0.90 0.94 1091 accuracy 0.95 2558 macro avg 0.95 0.94 0.95 2558 weighted avg 0.95 0.95 0.95 2558
=== Evaluating Model: no SA and 2 conv layers ===
Binary Accuracy: 0.9410
Confusion Matrix:
1439	28
123	968
Classification Report:
	precision	recall	f1-score	support
Non-Exocytosis	0.92	0.98	0.95	1467
Exocytosis	0.97	0.89	0.93	1091
accuracy	0.94	2558
macro	avg	0.95	0.93	0.94	2558
weighted	avg	0.94	0.94	0.94	2558
precision recall f1-score support Non-Exocytosis 0.92 0.98 0.95 1467 Exocytosis 0.97 0.89 0.93 1091 accuracy 0.94 2558 macro avg 0.95 0.93 0.94 2558 weighted avg 0.94 0.94 0.94 2558
=== Evaluating Model: no SA and 1 conv layer ===
Binary Accuracy: 0.9343
Confusion Matrix:
1419	48
120	971
Classification Report:
	precision	recall	f1-score	support
Non-Exocytosis	0.92	0.97	0.94	1467
Exocytosis	0.95	0.89	0.92	1091
accuracy	0.93	2558
macro	avg	0.94	0.93	0.93	2558
weighted	avg	0.94	0.93	0.93	2558
precision recall f1-score support Non-Exocytosis 0.92 0.97 0.94 1467 Exocytosis 0.95 0.89 0.92 1091 accuracy 0.93 2558 macro avg 0.94 0.93 0.93 2558 weighted avg 0.94 0.93 0.93 2558
=== Evaluating Model: 1 conv and 2x transformer layer ===
Binary Accuracy: 0.9242
Confusion Matrix:
1446	21
173	918
Classification Report:
	precision	recall	f1-score	support
Non-Exocytosis	0.89	0.99	0.94	1467
Exocytosis	0.98	0.84	0.9	1091
accuracy	0.92	2558
macro	avg	0.94	0.91	0.92	2558
weighted	avg	0.93	0.92	0.92	2558
precision recall f1-score support Non-Exocytosis 0.89 0.99 0.94 1467 Exocytosis 0.98 0.84 0.90 1091 accuracy 0.92 2558 macro avg 0.94 0.91 0.92 2558 weighted avg 0.93 0.92 0.92 2558
